# Supplementary material for: Wnt7a Inhibits IL-1β Induced Catabolic Gene Expression and Prevents Articular Cartilage Damage in Experimental Osteoarthritis
Source: PubMed Central journal article supplement (PMC5292965; doi:10.1038/srep41823), 2017-02-06
Supplement: srep41823-s1.pdf [file srep41823-s1.pdf]

# **Wnt7a Inhibits IL-1 $\beta$ Induced Catabolic Gene Expression and Prevents Articular Cartilage Damage in Experimental Osteoarthritis**

**Averi L. Gibson<sup>1,2</sup>, Carrie K. Hui Mingalone<sup>1,2</sup>, Andrea T. Foote<sup>2</sup>, Tomoya Uchimura<sup>1,2</sup>,  
Ming Zhang<sup>3</sup>, and Li Zeng<sup>1,2,4,\*</sup>**

<sup>1</sup> Program in Cellular, Molecular, and Developmental Biology, Sackler School of Graduate Biomedical Sciences, Tufts University, Boston, MA 02111.

<sup>2</sup> Department of Integrative Physiology and Pathobiology, Tufts University School of Medicine, Boston, MA 02111.

<sup>3</sup> Department of Rheumatology, Tufts Medical Center, 800 Washington Street, Boston, MA 02111, USA.

<sup>4</sup> Department of Orthopedics, Tufts Medical Center, 800 Washington Street, Boston, MA 02111, USA.

\* Corresponding Author: Li Zeng, Ph.D.

Email: [Li.Zeng@tufts.edu](mailto:Li.Zeng@tufts.edu)

Telephone: (617) 636-2107 Fax: (617) 636-3676

**a**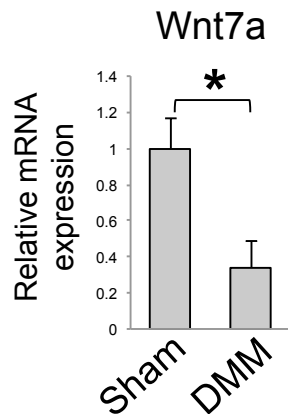**b**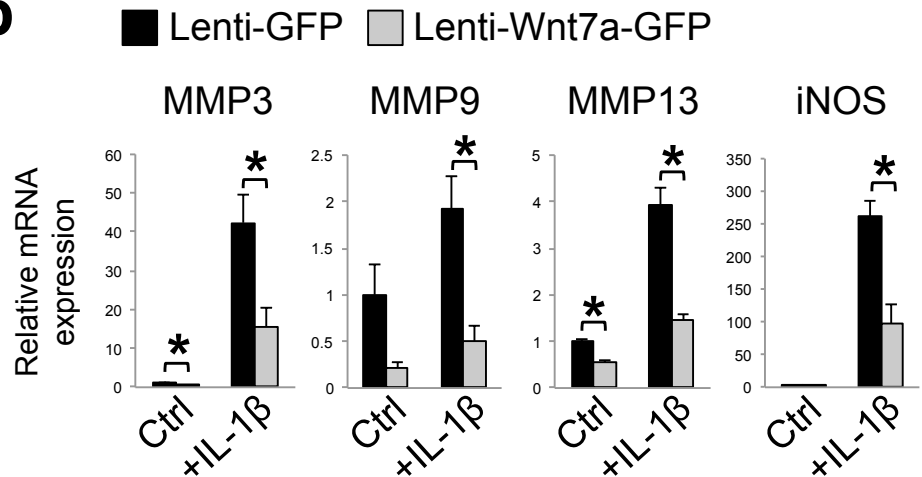

**Supplementary Figure 1. Wnt7a ectopic expression reduces IL-1 $\beta$  induced upregulation of**

**OA-related genes in murine chondrocytes *in vitro*.** **a.** RT-PCR analysis of Wnt7a gene

expression in tibial cartilage specimens isolated from mouse knees 8 weeks post DMM or sham surgery. A reduced Wnt7a gene expression was observed in the DMM knees compared to sham

controls. n = 3 mice/group. **b.** RT-PCR analysis of MMP3, MMP9, MMP13 and iNOS gene

expression in murine chondrocytes infected with lenti-GFP or lenti-Wnt7a-GFP and cultured with or

without IL-1 $\beta$  (5ng/mL). A student's t-test was used for evaluating the statistical significance of

sham vs. DMM gene expression and lenti-GFP vs. lenti-Wnt7a cell gene expression under either

control or IL-1 $\beta$  conditions. All data are shown as mean  $\pm$  SEM. \* = p < 0.05.

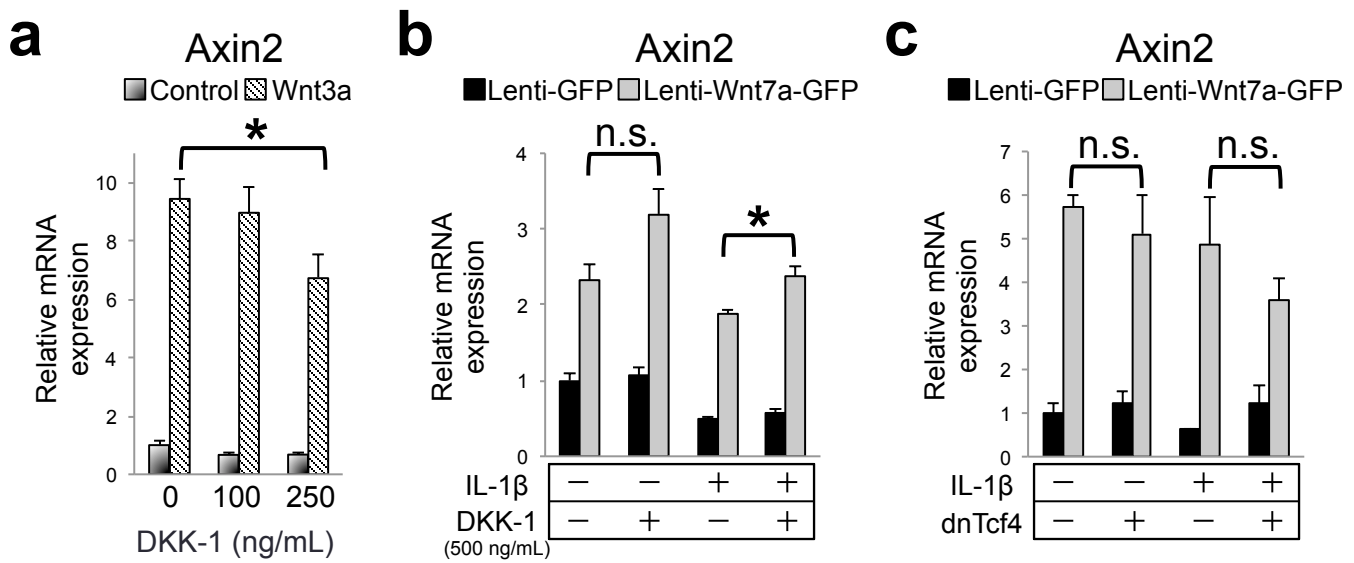

**Supplementary Figure 2. DKK-1 reduces Wnt3a-induced Axin2 expression in human**

**chondrocytes, but does not inhibit Wnt7a-induced Axin2 expression. a.** RT-PCR

analysis of Axin2 mRNA expression in nHACs cultured in Wnt3a or control conditioned media, in the presence of 0, 100, or 250 ng/mL DKK-1 for 2 days. Axin2 induction by Wnt3a

was inhibited by DKK-1 in a dose-dependent manner. **b.** RT-PCR analysis of Axin2 mRNA expression in nHACs infected with lenti-GFP or lenti-Wnt7a-GFP with or without a higher level of DKK-1 (500 ng/mL) for 2 days. Axin2 induction by Wnt7a was unaffected by DKK-1

when IL-1 $\beta$  was not added, and was even increased when IL-1 $\beta$  (5ng/mL) was added. **c.**

RT-PCR analysis of Axin2 mRNA expression in nHACs infected with lenti-GFP or lenti-Wnt7a-GFP, with or without dominant negative Tcf4 lentivirus (lenti-dnTcf4), and cultured

with or without 5 ng/mL IL-1 $\beta$  for 2 days. Lent-dnTcf4 also did not significantly affect the

Wnt7a induction of Axin2 mRNA expression. Analysis of variance (ANOVA) with post-hoc

tests was used for evaluating the statistical significance between the gene expression of

control vs. Wnt3a treated cells and lenti-GFP vs. lenti-Wnt7a treated cells across all of

experimental conditions. All data are shown as mean  $\pm$  SEM. \* =  $p < 0.05$ . n.s. = not

significant.

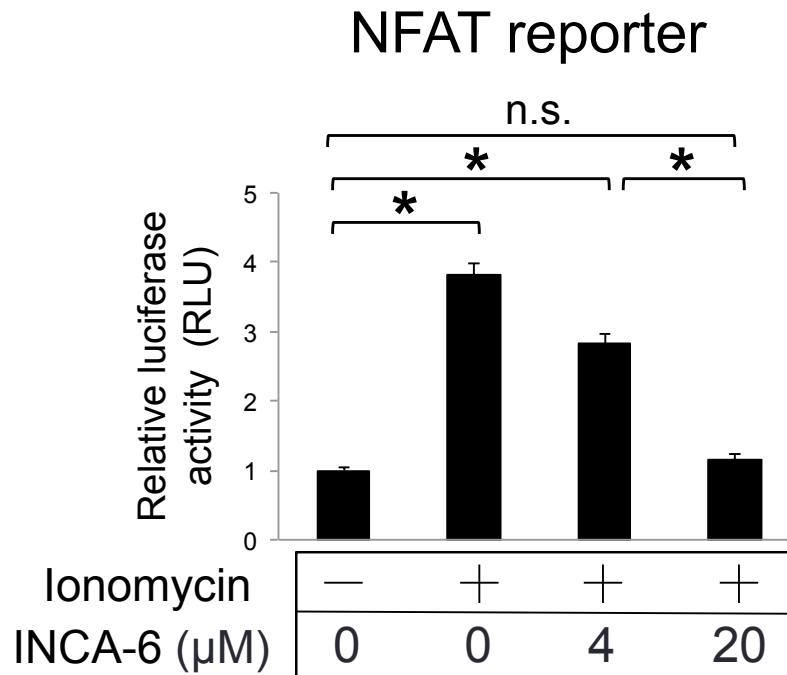

**Supplementary Figure 3. The NFAT signaling inhibitor INCA-6 inhibits NFAT activity.** NFAT luciferase reporter assay at 16 hours after treatment with or without 2 μM of ionomycin and 0, 4, or 20 μM of INCA-6. INCA-6 significantly reduced ionomycin activation of NFAT luciferase activity in a dose dependent manner. Analysis of variance (ANOVA) with post-hoc tests was used for evaluating the statistical significance between all experimental groups. Data are shown as mean ± SEM. \* =  $p < 0.05$ . n.s. = not significant.

**a** Original films for Figure 5b

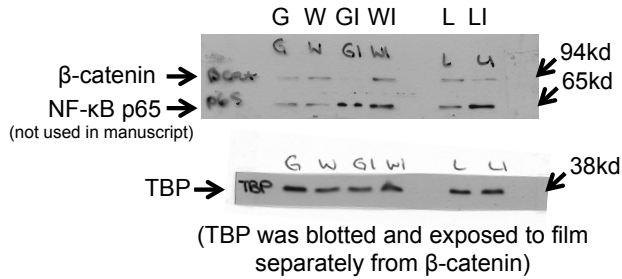

**Legend**

G = lenti-GFP  
 W = lenti-Wnt7a  
 GI = lenti-GFP + IL-1β  
 WI = lenti-Wnt7a + IL-1β  
 L = lithium chloride  
 (control, not used in the manuscript)  
 LI = lithium chloride + IL-1β  
 (control, not used in the manuscript)

**b** Original films for Figure 6a

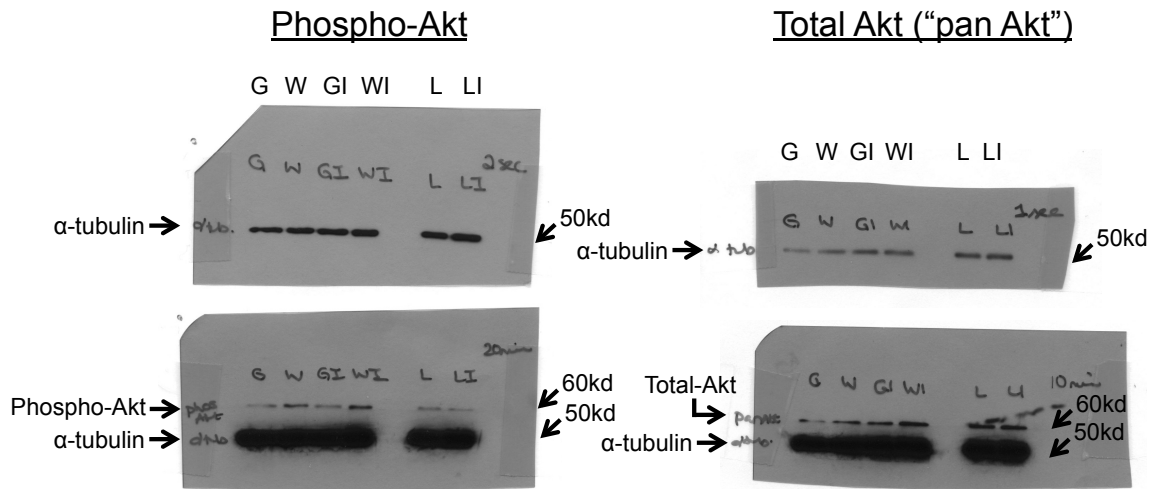

**c** Original films for Figure 7b (multiple exposures)

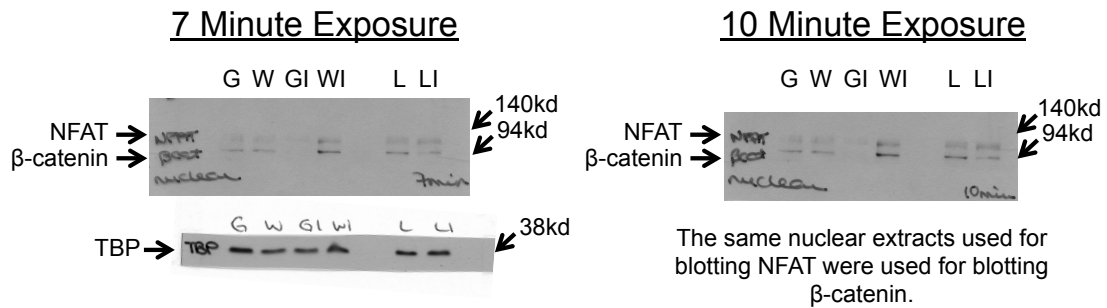

Original Western blot films for figures 5 - 7.
